# Supplementary material for: Co-existence of Quorum Sensing and Quorum Sensing Inhibitory Compounds in Marine Sponge <em>Sarcotragus spinosulus</em>
Source: Preprints.org preprint supplement (doi:10.20944/preprints201912.0184.v1), 2019-12-13
Supplement: Supplementary file 1 [file supplementary]

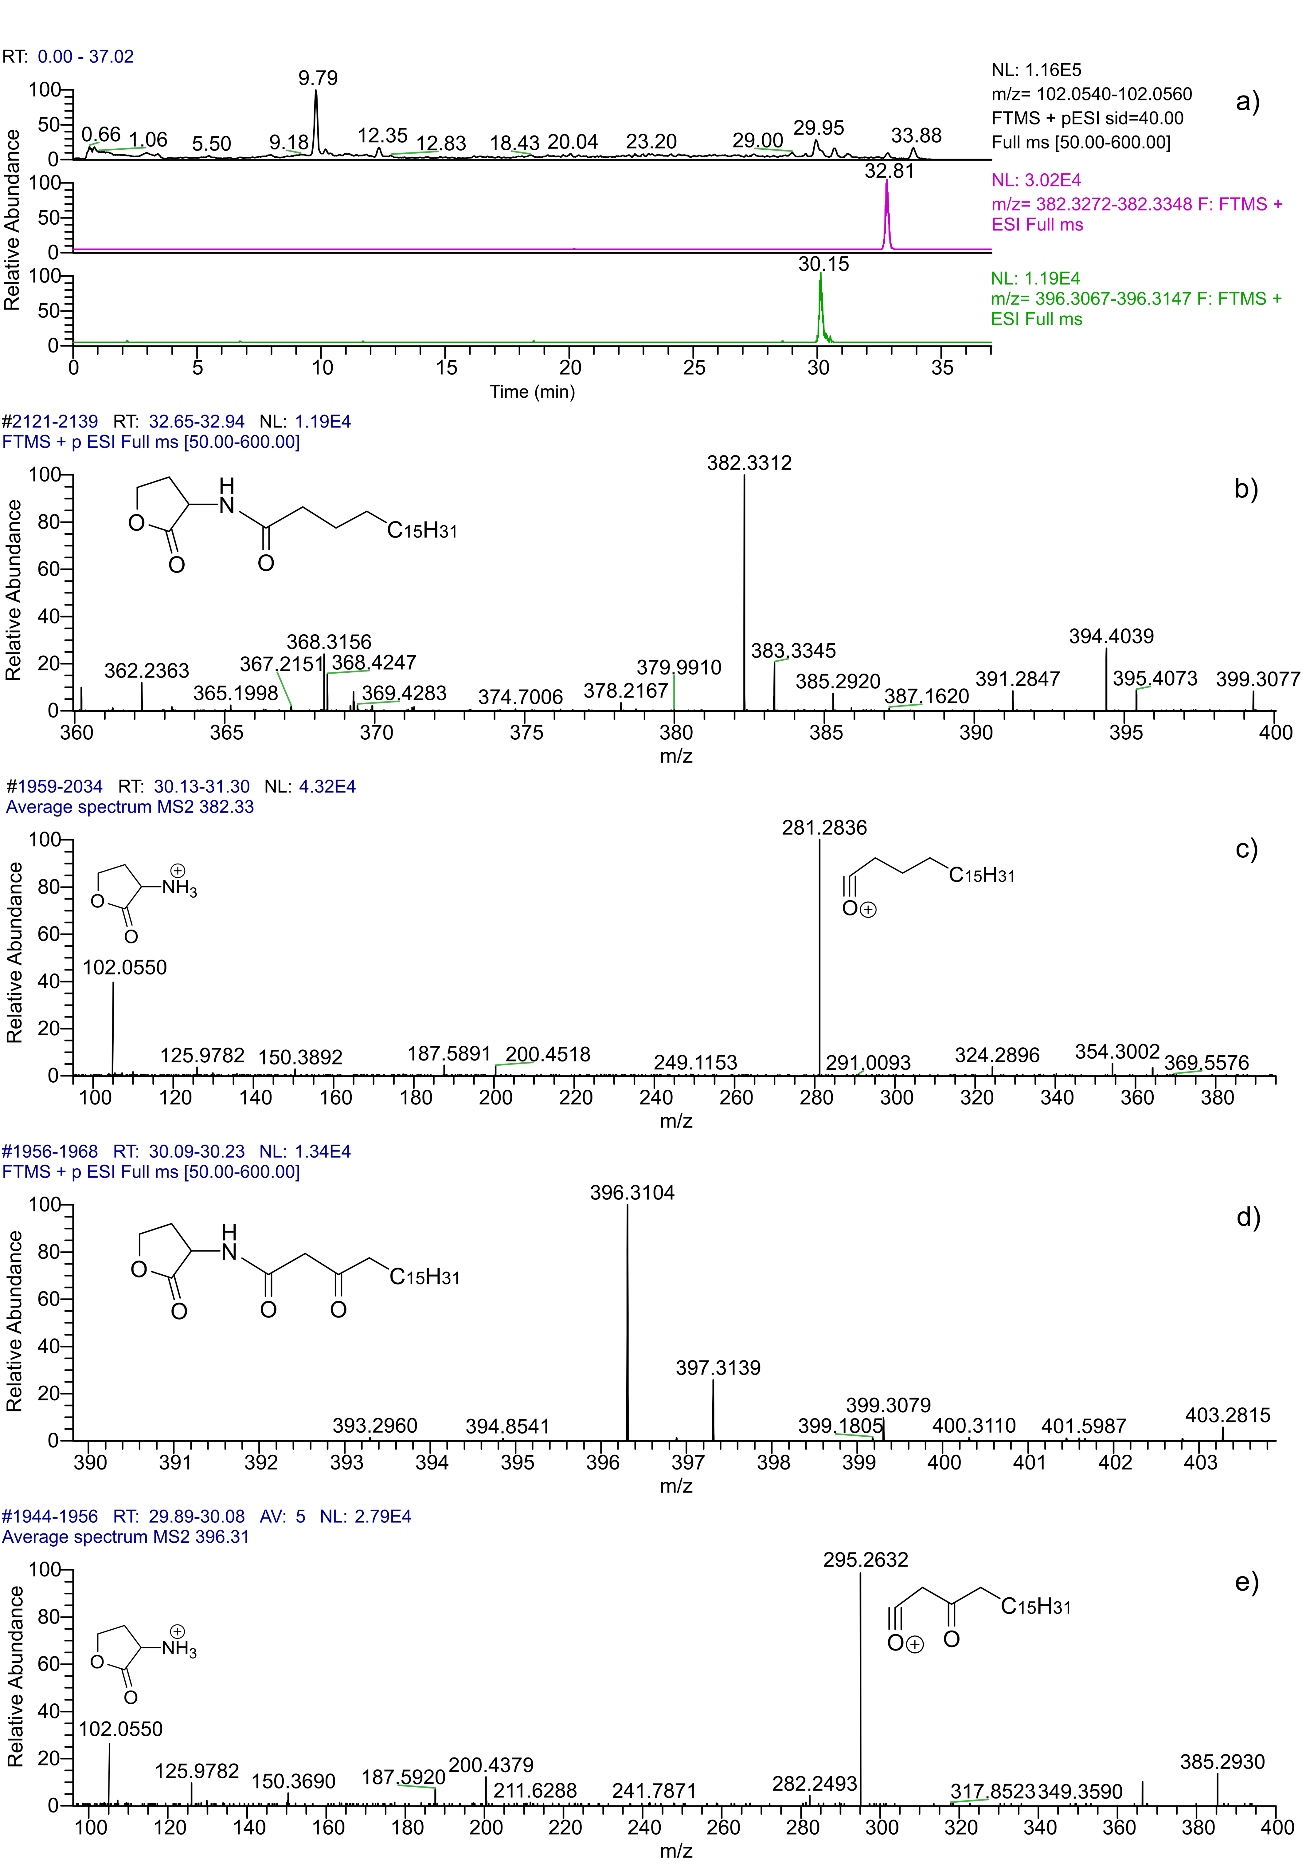

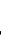


**Figure S1:**
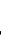
HR-MS and HR-MS/MS spectra of the new compounds C19-HSL and OC19-HSL; a) extracted ion chromatogram from the LC-HRMS analysis of the sponge enriched fraction S2 at *m/z* 102.0550 (black trace), corresponding to deacylated homoserine lactone, *m/z* 382.3312 (pink trace), corresponding to C19-HSL and *m/z* 396.3104 (green trace), corresponding to OC19-HSL; b), c) HR-MS and HR-MS/MS spectra of C19-HSL; d), e) HR-MS and HR-MS/MS spectra of OC19-HSL.


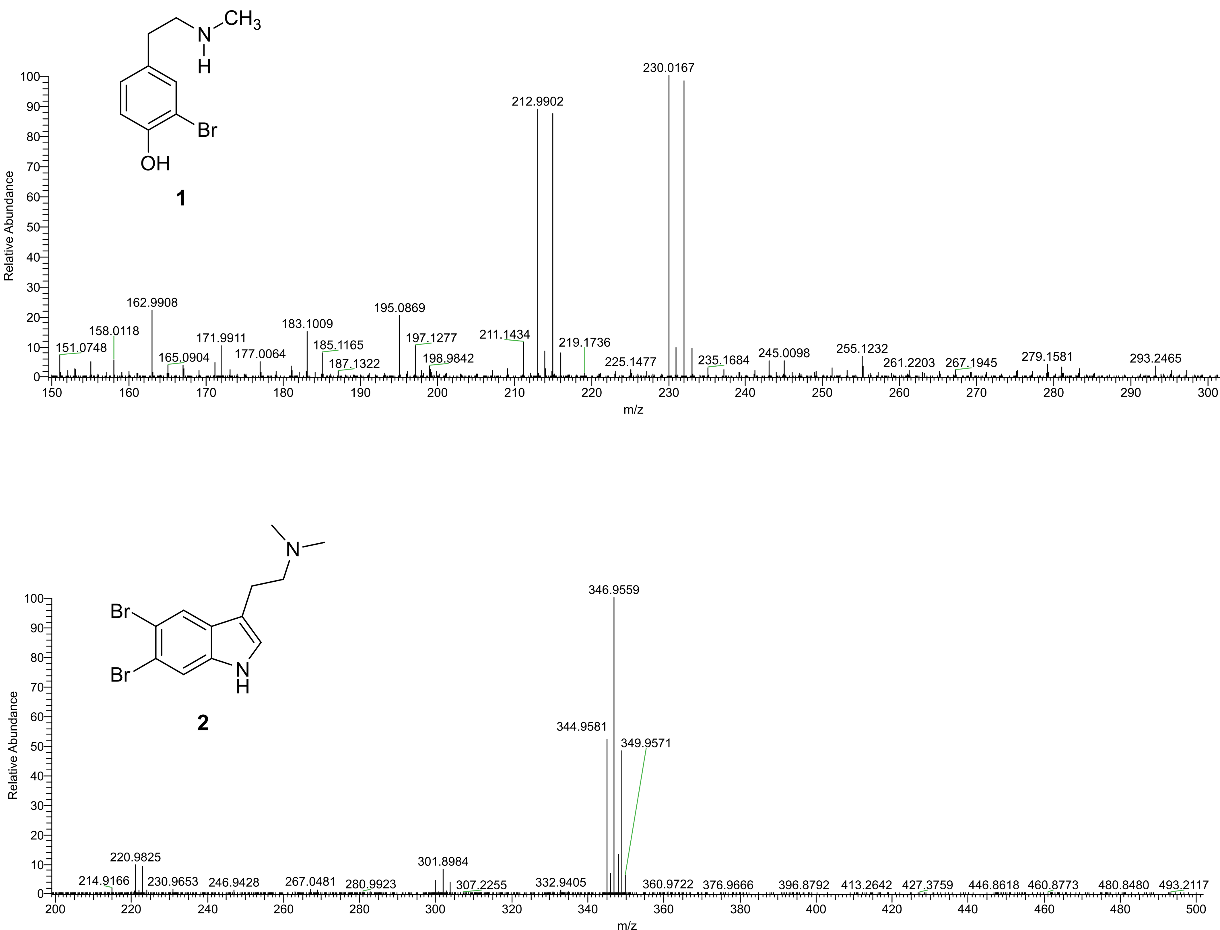


**Figure S2:**
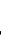
HR-MS spectra of compounds **1** and **2**.

**
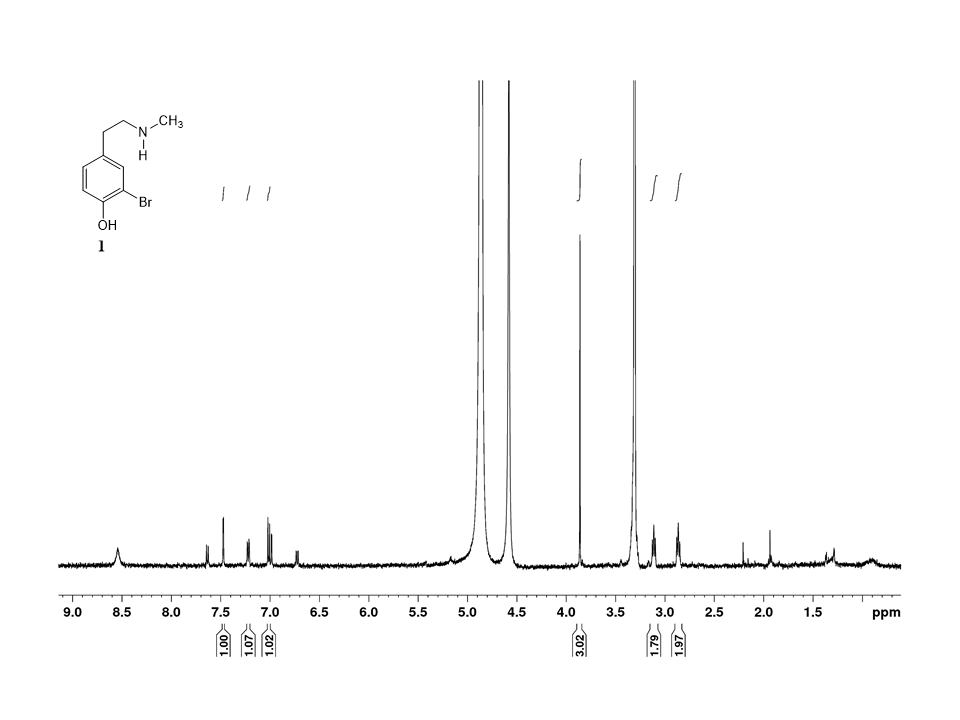

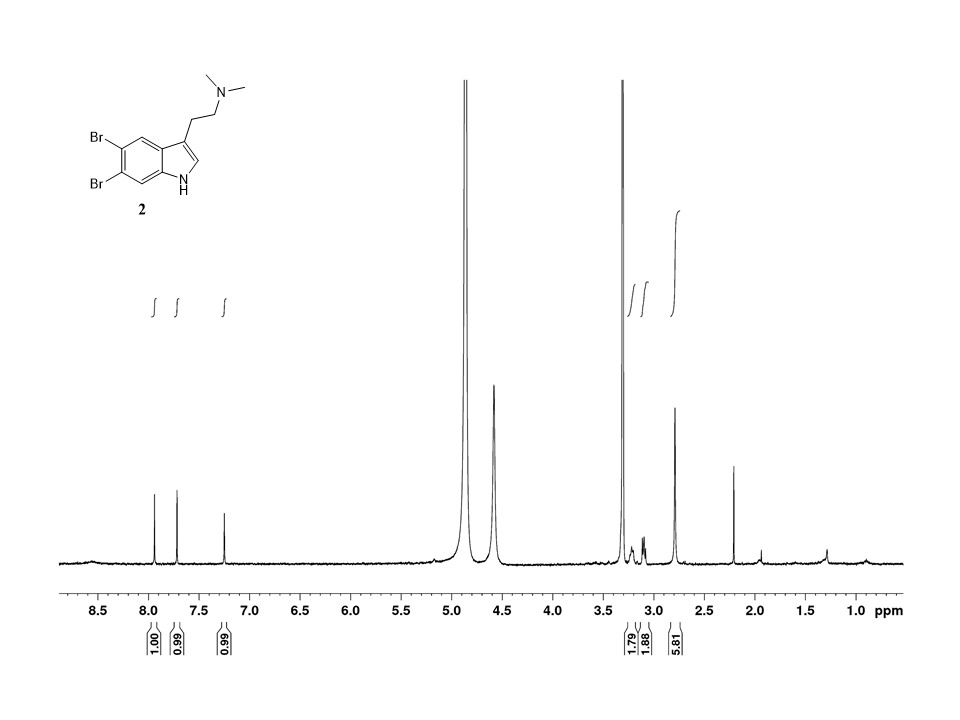
**

**Figure S3:**
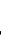
1HNMR spectra of compounds **1** and **2**.
